# Supplementary material
Source: PubMed Central journal article supplement (PMC5140037)

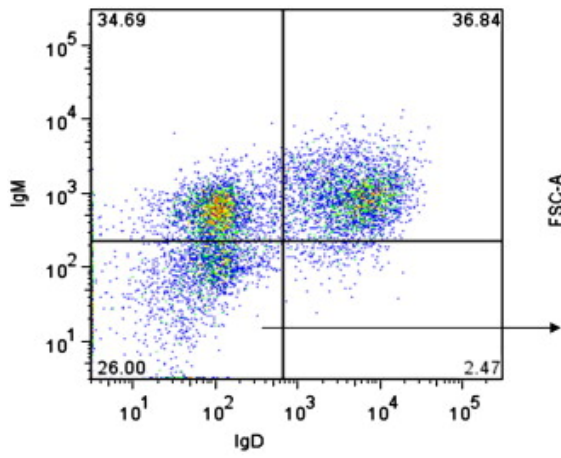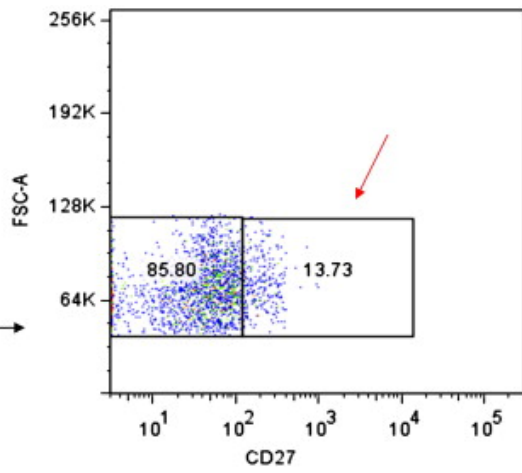

Supplement: NIHMS606242-supplement-Supplementary_Fig_1.pdf [file NIHMS606242-supplement-Supplementary_Fig_1.pdf]
